# Supplementary material for: An Asymmetric Intramolecular Rauhut-Currier Reaction Initiated by Chiral Selenolate-BINOL Complexes
Source: MDPI journal article supplement (doi:10.3390/appliedchem2020004), 2022-04-19
Supplement: s1 [file s1]

Archive with 1 entries (1 files):
- appliedchem-1640744-Supplementary.pdf
