# Supplementary material for: An Asymmetric Intramolecular Rauhut-Currier Reaction Initiated by Chiral Selenolate-BINOL Complexes
Source: MDPI journal article supplement (doi:10.3390/appliedchem2020004), 2022-04-19
Supplement: s1 [file s1 › appliedchem-1640744-Supplementary.pdf]

# Supplementary Materials: An Asymmetric Intramolecular Rau- hut-Currier Reaction Initiated by Chiral Selenolate-BINOL Complexes

Gabriela Całka-Kuc and Szymon Buda

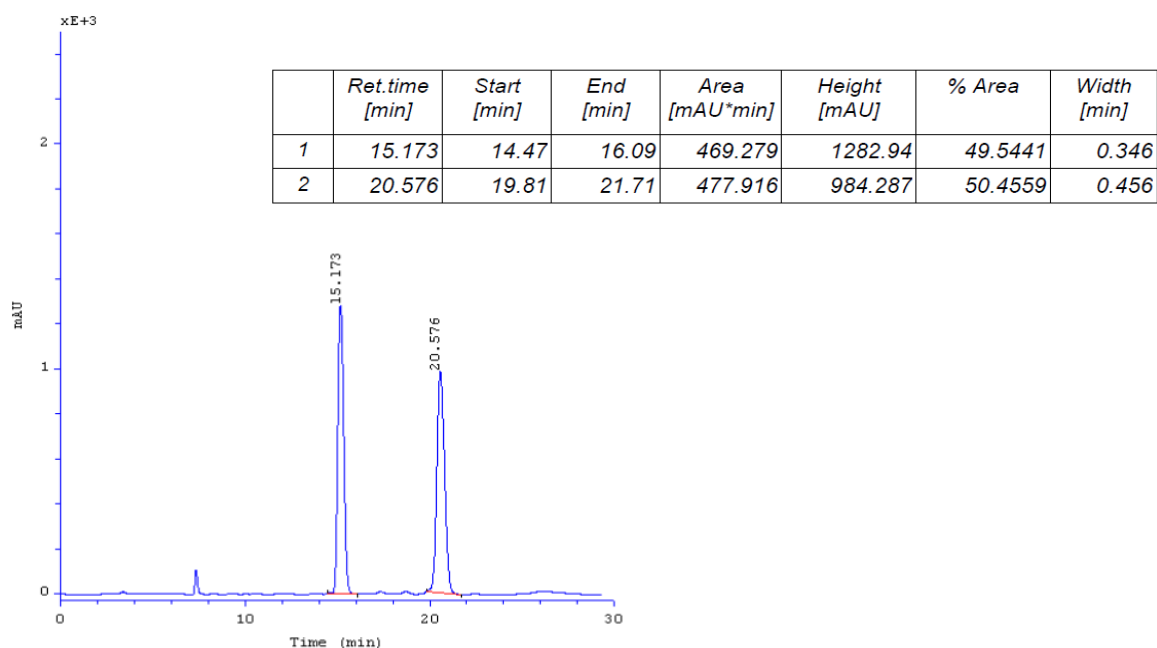

**Figure S1.** HPLC for racemic mixture of product 4, (entry 6 in table 4).

Standard reaction conditions - 1 equiv *n*-BuSeLi, 1 equiv 3, 20 equiv H<sub>2</sub>O, 6 equiv *t*-BuOK, THF:ACN 1:3, for 24 h (10 h at T1; 14 h at T2). The reaction was quenched with 5 equiv of H<sub>2</sub>O<sub>2</sub> and 5 equiv of pyridine. C = 0.08 M.

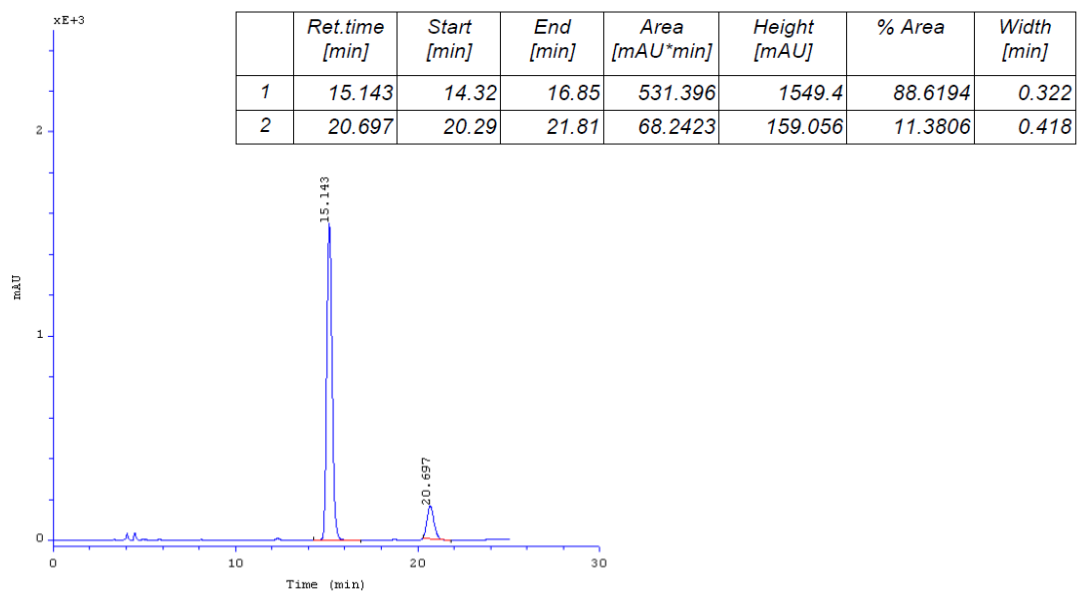

**Figure S2.** HPLC for reaction with (*S*)-BINOL-scandium triflate(III)-NMM complex (table 10, entry 5).

Standard reaction conditions – 1 equiv *n*-BuSeLi, 1 equiv **3**, 1 equiv of complex **15**, THF:DCM 1:3. 24 h. The reaction was quenched by 5 equiv of H<sub>2</sub>O<sub>2</sub> and 5 equiv of pyridine, C = 0.08.

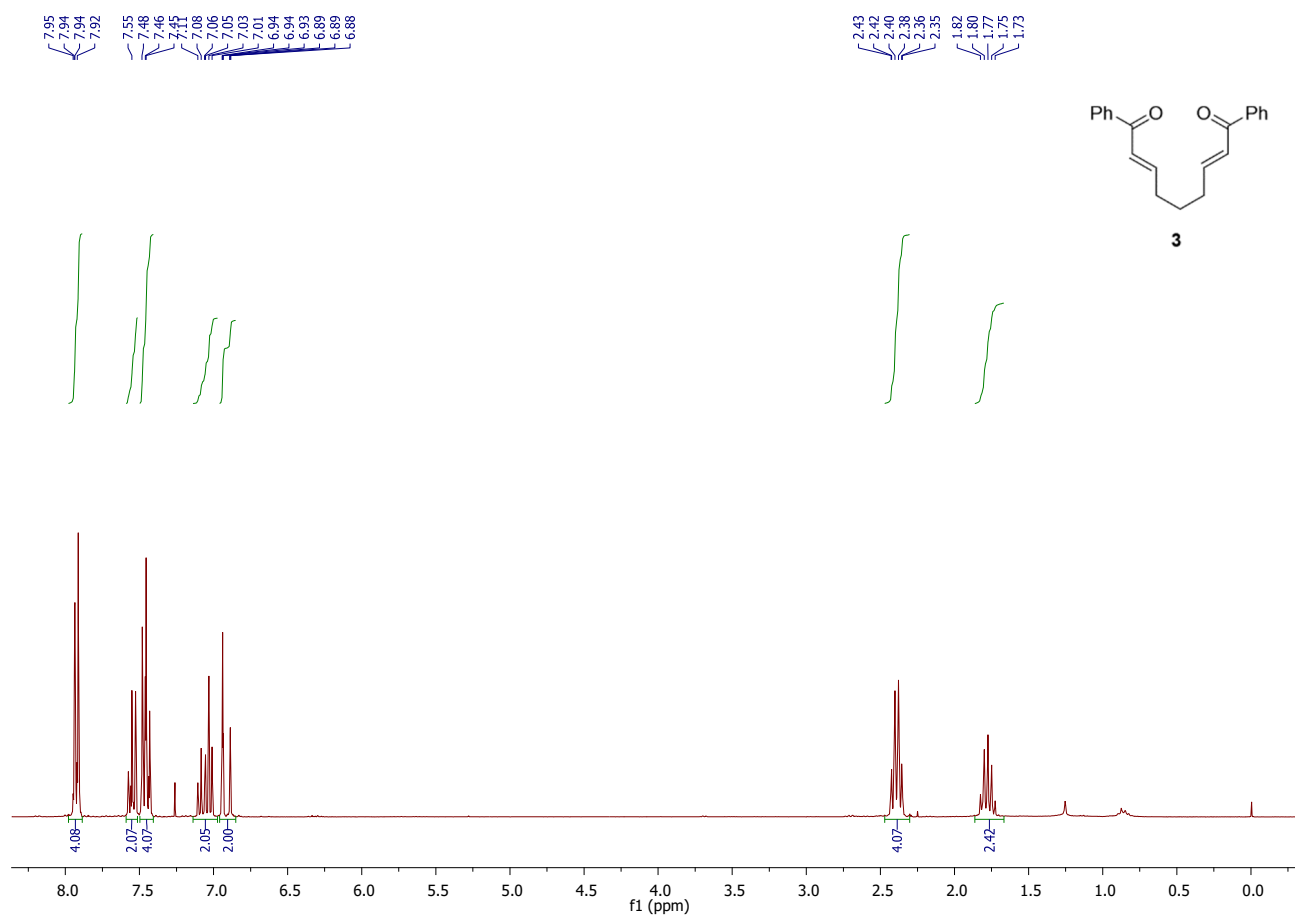

**Figure S3.** <sup>1</sup>H-NMR spectra of compound **3** (CDCl<sub>3</sub>).

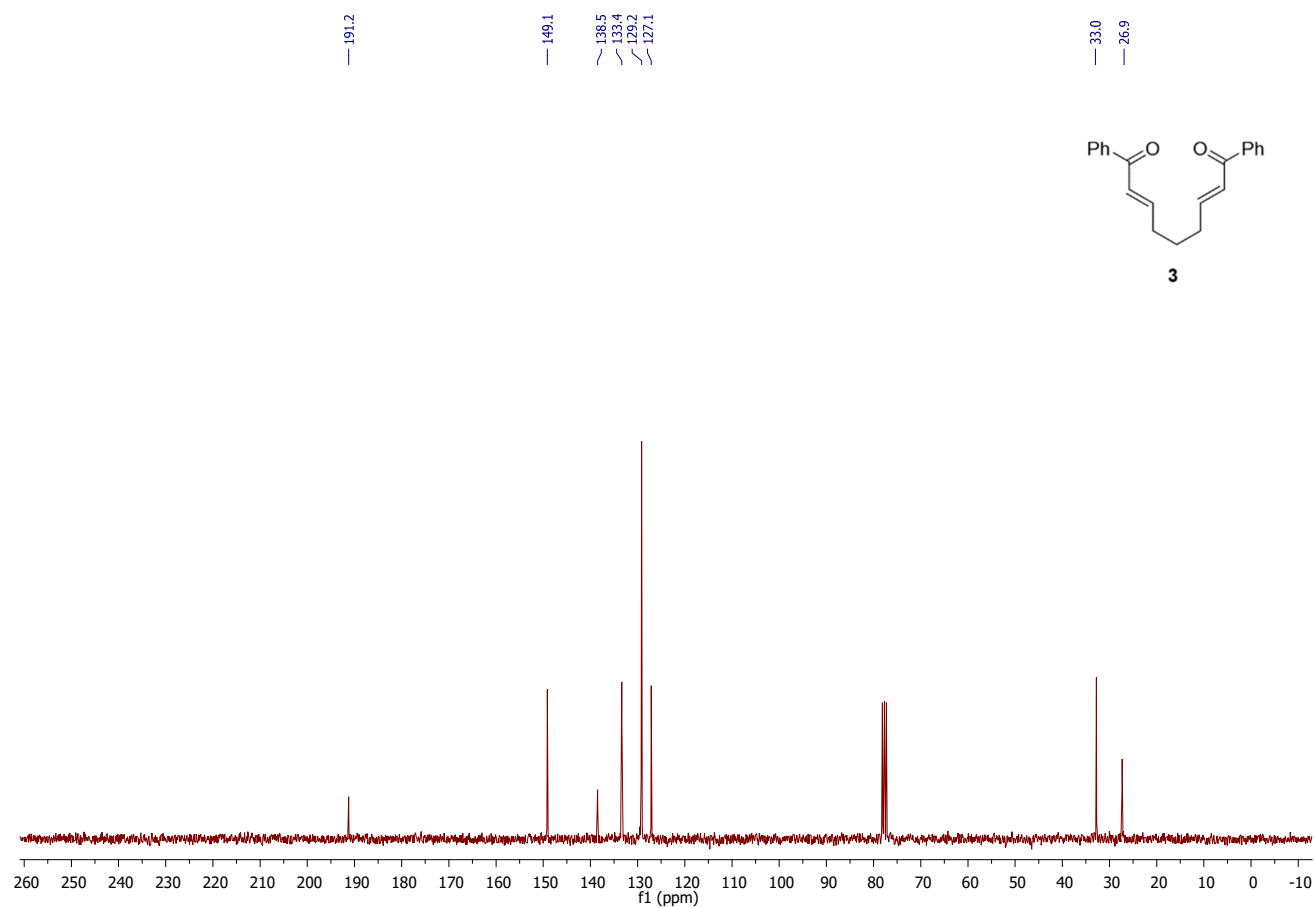

**Figure S4.** <sup>13</sup>C-NMR spectra of compound **3** (CDCl<sub>3</sub>).

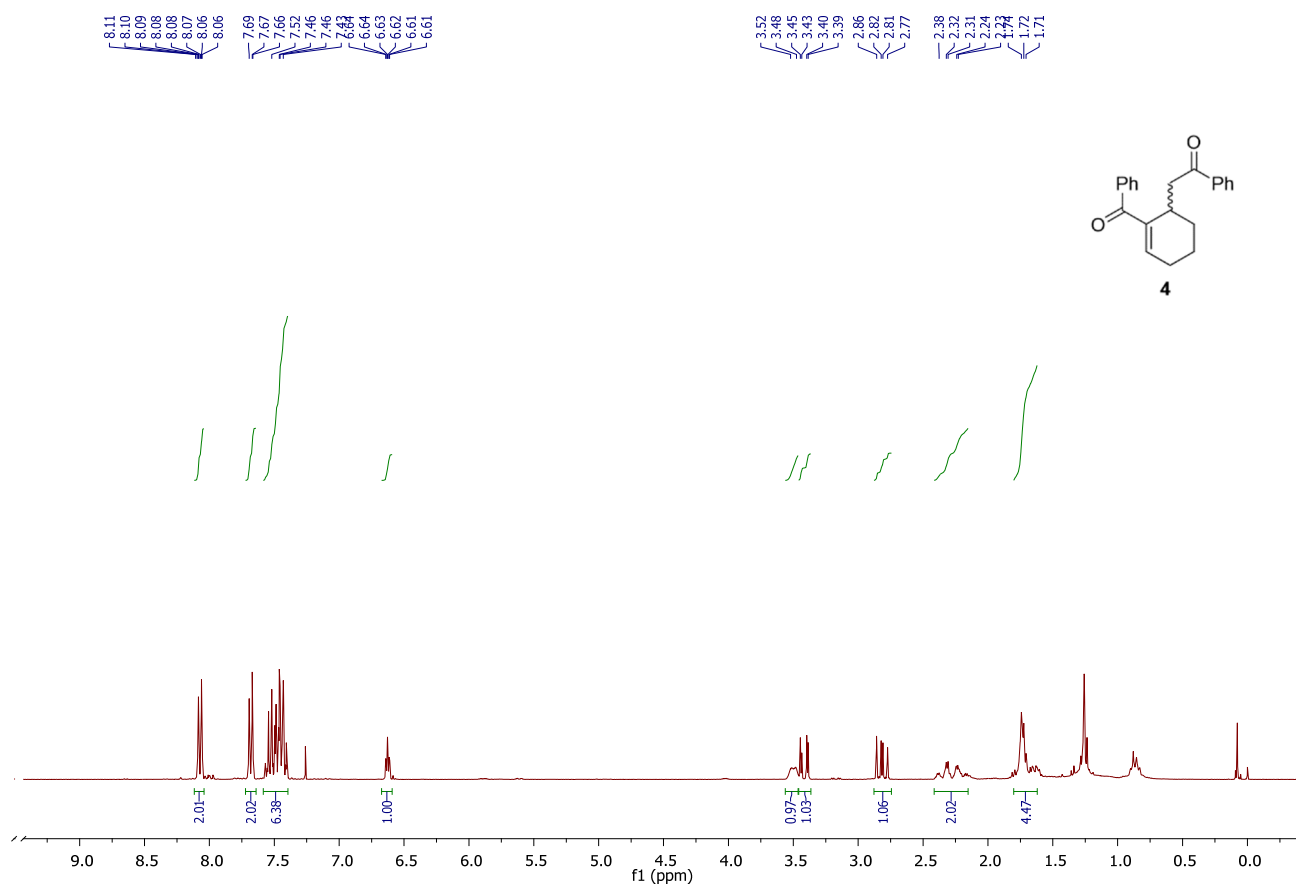

**Figure S5.** <sup>1</sup>H-NMR spectra of compound **4** (CDCl<sub>3</sub>).

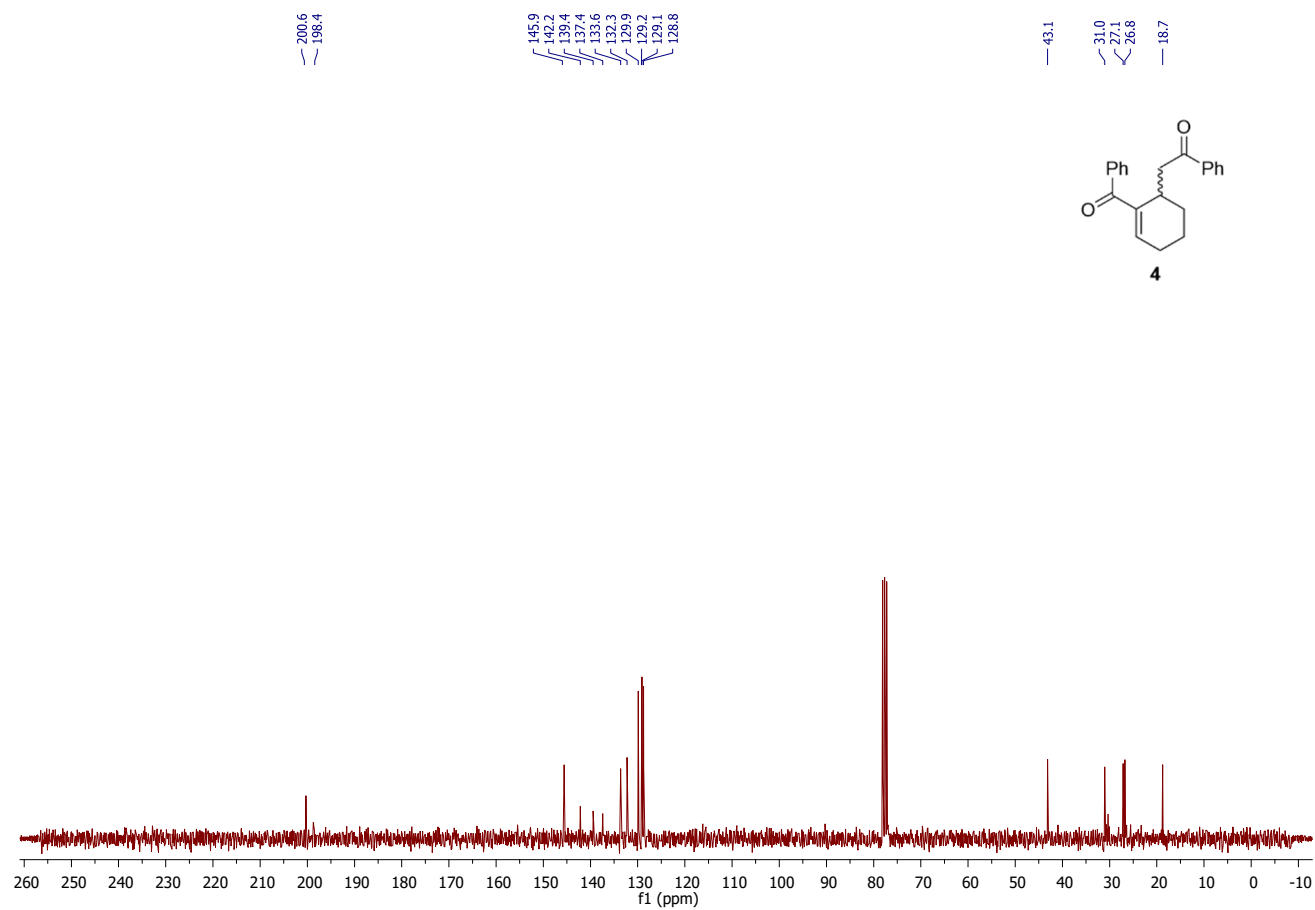

**Figure S6.** <sup>13</sup>C-NMR spectra of compound 4 (CDCl<sub>3</sub>).
